# Supplementary material for: No evidence for tephra in Greenland from the historic eruption of Vesuvius in 79 CE: implications for geochronology and paleoclimatology
Source: Copernicus journal article supplement (doi:10.5194/cp-18-45-2022), 2022-01-18
Supplement: Supplementary file 1 [file cp-18-45-2022-supplement.zip]

Archive with 7 entries (7 files):
- FigS2.gif
- FigS1.gif
- FigS3.gif
- Dataset 1.xlsx
- Dataset 2.xlsx
- cp-18-45-2022-supplement-title-page.pdf
- Supplementary Information_Final.docx
