# Supplementary material for: No evidence for tephra in Greenland from the historic eruption of Vesuvius in 79 CE: implications for geochronology and paleoclimatology
Source: Copernicus journal article supplement (doi:10.5194/cp-18-45-2022), 2022-01-18
Supplement: Supplementary file 1 [file cp-18-45-2022-supplement.zip › cp-18-45-2022-supplement-title-page.pdf]

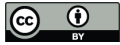

*Supplement of*

**No evidence for tephra in Greenland from the historic eruption of Vesuvius in 79 CE: implications for geochronology and paleoclimatology**

**Gill Plunkett et al.**

*Correspondence to:* Gill Plunkett (g.plunkett@qub.ac.uk)

- cp-18-45-2022-supplement-title-page.pdf
- Dataset 1.xlsx
- Dataset 2.xlsx
- FigS1.gif
- FigS2.gif
- FigS3.gif
- Supplementary Information\_Final.docx

The copyright of individual parts of the supplement might differ from the article licence.
