# Supplementary material for: No evidence for tephra in Greenland from the historic eruption of Vesuvius in 79 CE: implications for geochronology and paleoclimatology
Source: Copernicus journal article supplement (doi:10.5194/cp-18-45-2022), 2022-01-18
Supplement: Supplementary file 1 [file cp-18-45-2022-supplement.zip › Supplementary Information_Final.docx]

**No evidence for tephra in Greenland from the historic eruption of Vesuvius in 79 CE: Implications for geochronology and paleoclimatology**

Gill Plunkett et al.

*Correspondence to*: Gill Plunkett ([g.plunkett@qub.ac.uk](mailto:g.plunkett@qub.ac.uk))

**Supplementary information**

**1 NEEM-2011-S1 ice core sample details**

| **Sample depth (m)** | **Length (cm)** | **Mass (g)** | **g/cm** | **Tephra sample** | **Shards/g** |
| --- | --- | --- | --- | --- | --- |
| 410.85–410.65 | 20 | 289 | 14.4 | QUB-1832 | 0.06 |
| 410.65–410.40 | 25 | 394 | 15.8 | QUB-1833 | 0.01 |
| 410.40–410.20 | 20 | 214 | 10.7 | QUB-1834 | 0 |

**2 Reference tephra samples**

Reference tephra samples were prepared for major element geochemical analysis at Queen’s University Belfast. All samples were ground and sieved, and the fraction between 26 to 75 *μ*m was mounted on a glass slide, covered in Buehler EpoxiCure 2 resin, which was ground and polished to expose the surface of glass shards.

**2.1 Chikurachki tephra samples**

OSC1–5 samples from location A08 on Paramushir Island, Kurile Islands, as described in Hasegawa et al. (2011). At this location, OSC1-5 appears as a single unit, but can be distinguished in other exposures as a series of five distinct units separated by very thin soil horizons, of which OSC3 was the thickest (estimated tephra volume 0.06 km3). The five units were erupted between 1600 BCE and 400 CE.

**2.2 Popocatépetl samples**

Reference samples were obtained from the Division of Petrology and Volcanology, Department of Mineral Sciences, Smithsonian Institution, and from the Department of Volcanology, Autonomous University of Mexico.

| **Sample ID** | **Material** | **Location** | **Collector** |
| --- | --- | --- | --- |
| NMNH 107955 | Volcanic ash | - | W. Foshag |
| NMNH 107956-1 | Andesitic volcanic ash | Puebla; Puerto de Tlamacas, 14,000 ft above | W. Foshag |
| NMNH 117629-15 | Volcanic ash | Tlamacas, Puebla-Morelos border | W. Foshag |
| NMNH 117629-16 | Volcanic ash | Paseo de Cortez, Puebla-Morelos border | W. Foshag |
| PO-15040 | Lorenzo Plinian pumice | 19°02’25.9” N, 98°33’48.4” W, 2215 m above sea level | C. Siebe |
| PO-15040 | Pink3 Plinian pumice | 19°02’25.9” N, 98°33’48.4” W, 3080 m above sea level | C. Siebe |

**3 Images of QUB-1832 and QUB-1833 shards**


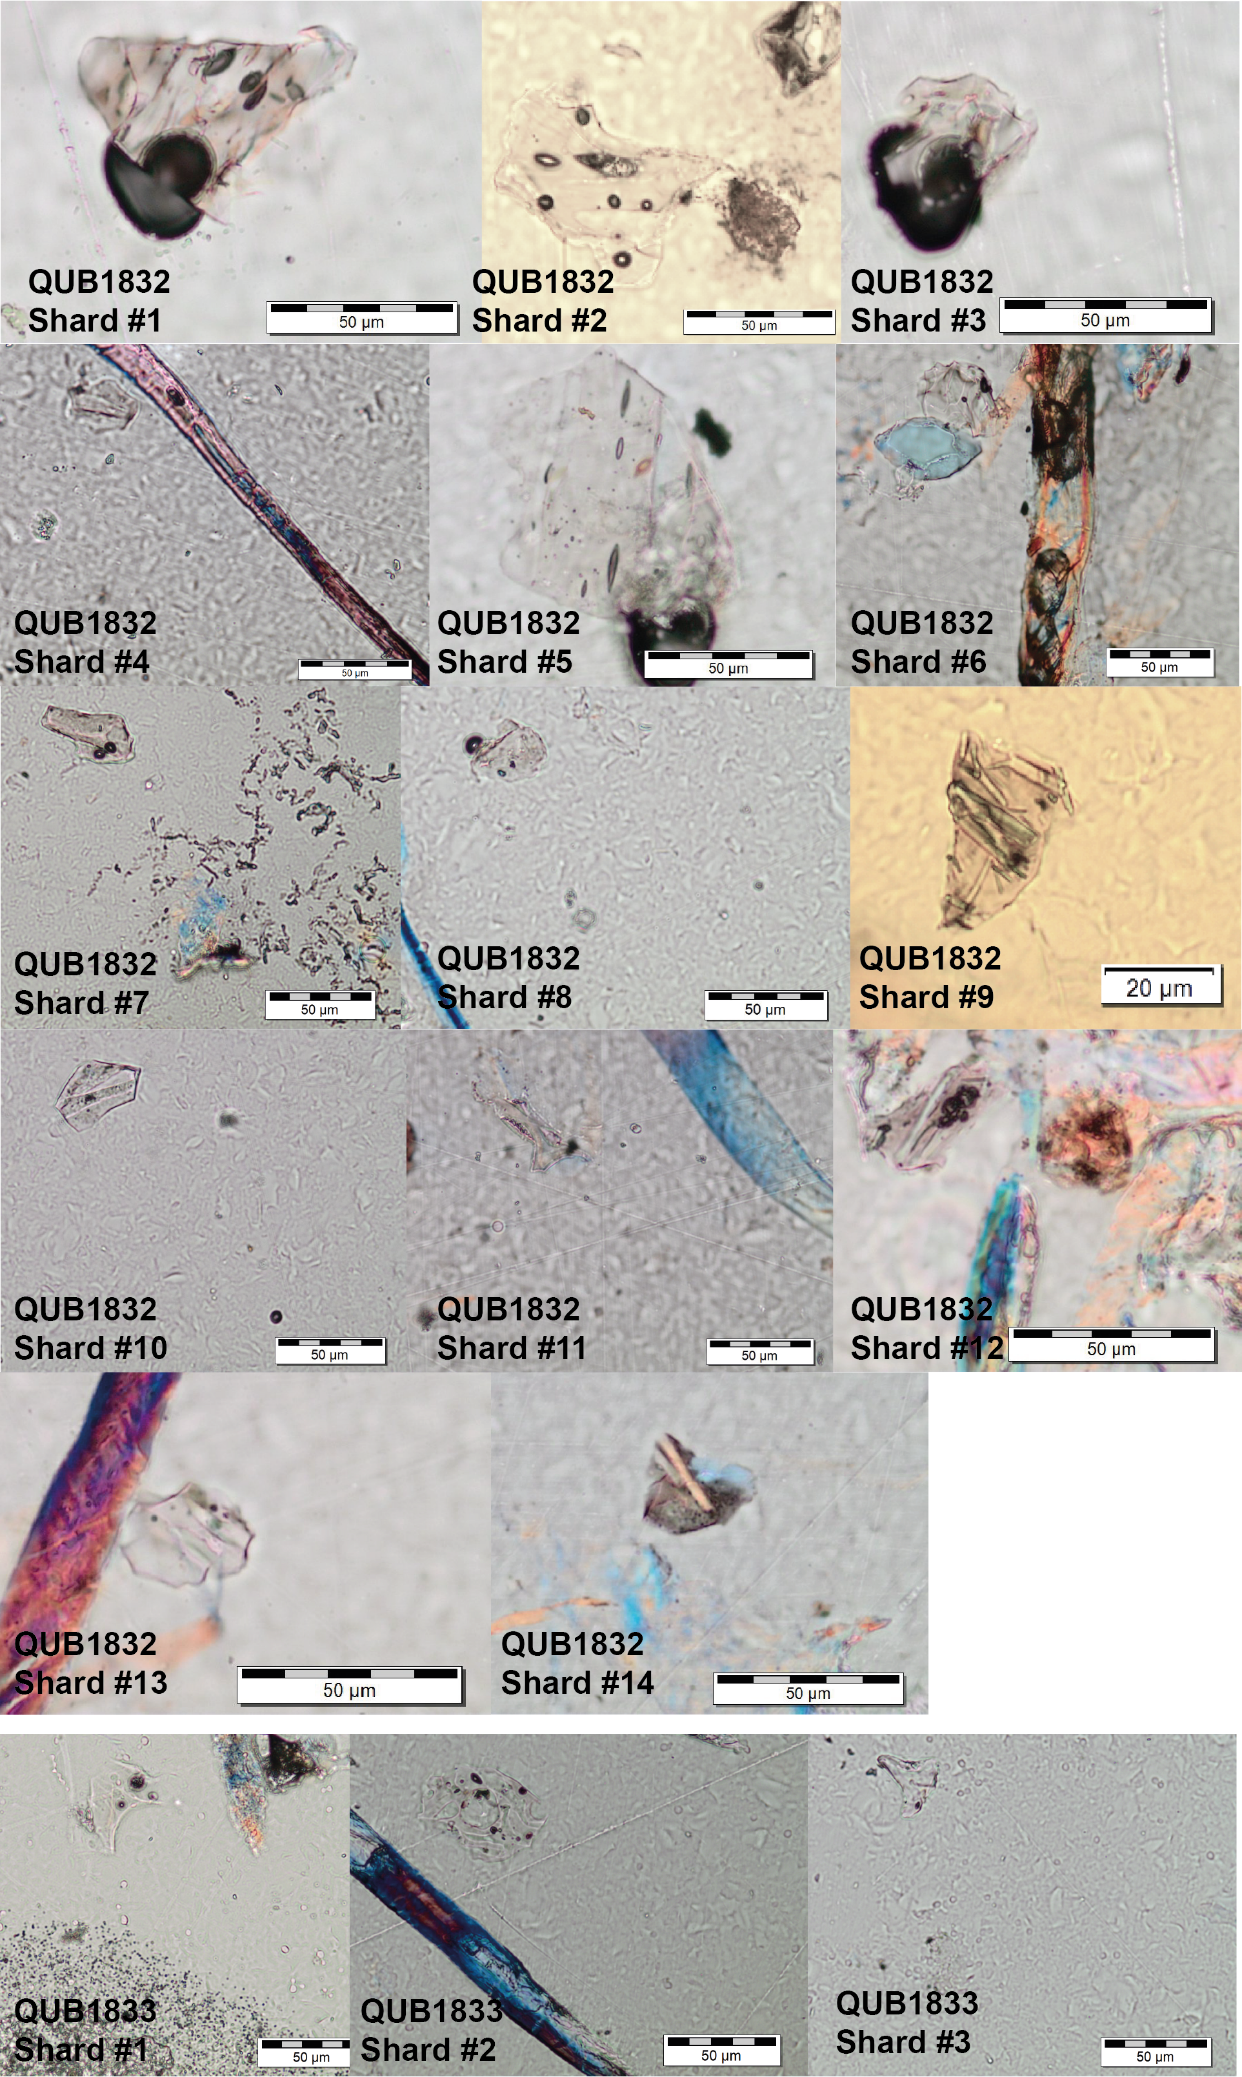


**4 Ash3d model parameters**

*Grid parameters*

Longitude minimum: 0.0, Longitude maximum: 360.0

Latitude minimum: 0.0, Latitude maximum: 82.0

Cell size in longitude, latitude: 0.5 degrees

Cell thickness: 1 km

*Eruption source parameters*

All runs used a Suzuki profile for the source distribution (k=4) with umbrella cloud spreading.

For the runs with eruption source parameters drawn from the geologic record, the following parameters were used.

Aniakchak:

In the absence of eruption data for Aniakchak eruptions of comparable magnitudes, we have based grain size distributions on generalised data from Aleutian andesitic eruptions.

Plume height = 12 km

Eruptive volume (DRE) = 0.5 km3

Eruption duration = 12 hours

Grain size distribution:

| Bin # | Grain size (mm) | Mass Fraction | Density (kg/m3) | Shape Factor (F) |
| --- | --- | --- | --- | --- |
| 1 | 0.500 | 0.70 | 1500.0 | 0.44 |
| 2 | 0.080 | 0.20 | 2200.0 | 0.44 |
| 3 | 0.030 | 0.10 | 2500.0 | 0.44 |

Chikurachki:

Model parameters are drawn from data for the 1986 Chikurachki eruption (Belousova and Belousov, 2002).

Plume Height = 11 km

Eruptive Vol. (DRE) = 0.25 km3

Eruption duration = 7 hours

Grain size distribution:

| Bin # | Grain size (mm) | Mass Fraction | Density (kg/m3) | Shape Factor (F) |
| --- | --- | --- | --- | --- |
| 1 | 0.5000 | 0.75 | 1750.0 | 0.44 |
| 2 | 0.2500 | 0.17 | 2000.0 | 0.44 |
| 3 | 0.1250 | 0.05 | 2000.0 | 0.44 |
| 4 | 0.0625 | 0.02 | 2000.0 | 0.44 |
| 5 | 0.0313 | 0.01 | 2200.0 | 0.44 |

Popocatepetl:

Eruption parameters combine grain size information for the Ochre Pumice eruption of ~3700 yr BP (Arana-Salinas et al., 2010) with the eruption magnitude of the VEI 5 Lorenzo Pumice of ~2150 BP (Panfil et al., 1999).

Plume Height = 30 km

Eruptive Vol. (DRE) = 1.0 km3

Eruption duration = 20 hours

Grain size distribution:

| Bin # | Grain size (mm) | Mass Fraction | Density (kg/m3) | Shape Factor (F) |
| --- | --- | --- | --- | --- |
| 1 | 0.2500 | 0.15 | 1750.0 | 0.44 |
| 2 | 0.1250 | 0.20 | 2000.0 | 0.44 |
| 3 | 0.0625 | 0.40 | 2000.0 | 0.44 |
| 4 | 0.0313 | 0.25 | 2200.0 | 0.44 |

For the 1,000 runs with eruption source parameters drawn from stochastic distributions, the grainsize distribution was not varied. The grainsize distribution given above for Popocatépetl was used for all these stochastic runs.

**References**

Arana-Salinas, L., Siebe, C., and Macías, J. L.: Dynamics of the ca. 4965 yr 14C BP “Ochre Pumice” Plinian eruption of Popocatépetl volcano, México, J. Volcanol. Geoth. Res., 192, 212–231, https://doi.org/10.1016/j.jvolgeores.2010.02.022, 2010.

Belousov A. and Belousova M.: Chikurachki volcano (Kurile islands, Russia): the unique volcano with frequent basaltic Plinian eruptions, 3rd Biennial Workshop on subduction processes emphasizing the Kurile-Kamchatkan-Aleutian Arcs, Fairbanks, Alaska, <http://www.kscnet.ru/ivs/lavdi/staff/belousov/chik-poster.pdf>, 2002.

Hasegawa, T., Nakagawa, M., Yoshimoto, M., Ishizuka, Y., Hirose, W., Seki, S. I., Ponomareva, V., and Alexander, R.: Tephrostratigraphy and petrological study of Chikurachki and Fuss volcanoes, western Paramushir Island, northern Kurile Islands: Evaluation of Holocene eruptive activity and temporal change of magma system, Quaternary International, 246, 278-297, doi.org/10.1016/j.quaint.2011.06.047, 2011.

Panfil, M. S., Gardner, T. W., and Hirth, K. G.: Late Holocene stratigraphy of the Tetimpa archaeological sites, northeast flank of Popocatépetl volcano, central Mexico, GSA Bull., 111, 204–218, doi: https://doi.org/10.1130/0016-7606(1999)111<0204:LHSOTT>2.3.CO;2, 1999.
