# Supplementary figures and images for: No evidence for tephra in Greenland from the historic eruption of Vesuvius in 79 CE: implications for geochronology and paleoclimatology
Source: Copernicus journal article supplement (doi:10.5194/cp-18-45-2022), 2022-01-18

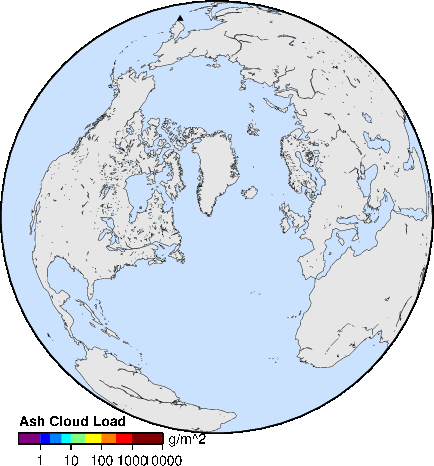

Supplement: Supplementary file 1 [file cp-18-45-2022-supplement.zip › FigS2.gif]

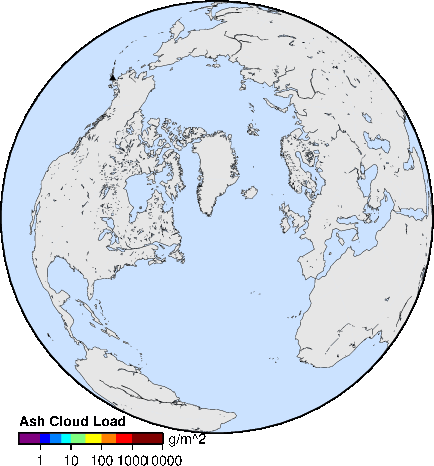

Supplement: Supplementary file 1 [file cp-18-45-2022-supplement.zip › FigS1.gif]

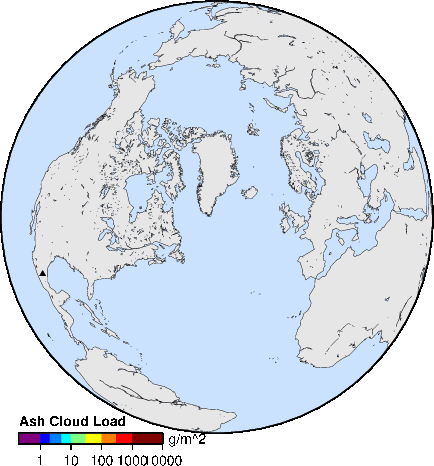

Supplement: Supplementary file 1 [file cp-18-45-2022-supplement.zip › FigS3.gif]
